# Supplementary material for: Zirconia-Toughened Alumina (ZTA) Nanoceramics with a Gradient Microstructure: A Comparative Study of ZTA Ceramics with Fibrous and Granular Morphology
Source: MDPI journal article supplement (doi:10.3390/mi14091681), 2023-08-28
Supplement: s1 [file s1]

Supplementary Materials

# Zirconia-Toughened Alumina (ZTA) Nanoceramics with A Gradient Microstructure: A Comparative Study of ZTA Ceramics with Fibrous and Granular Morphology

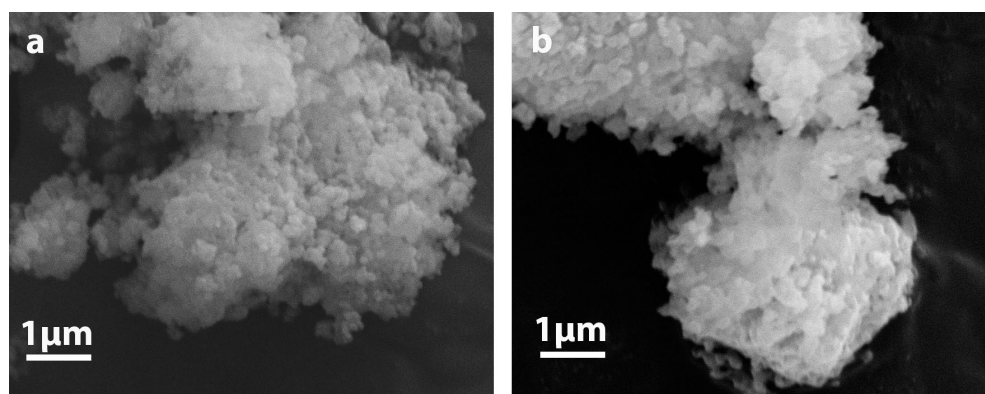

Figure S1. Morphology of the granular Y-ZTA (a) and Ce-ZTA (b) composite ceramics.

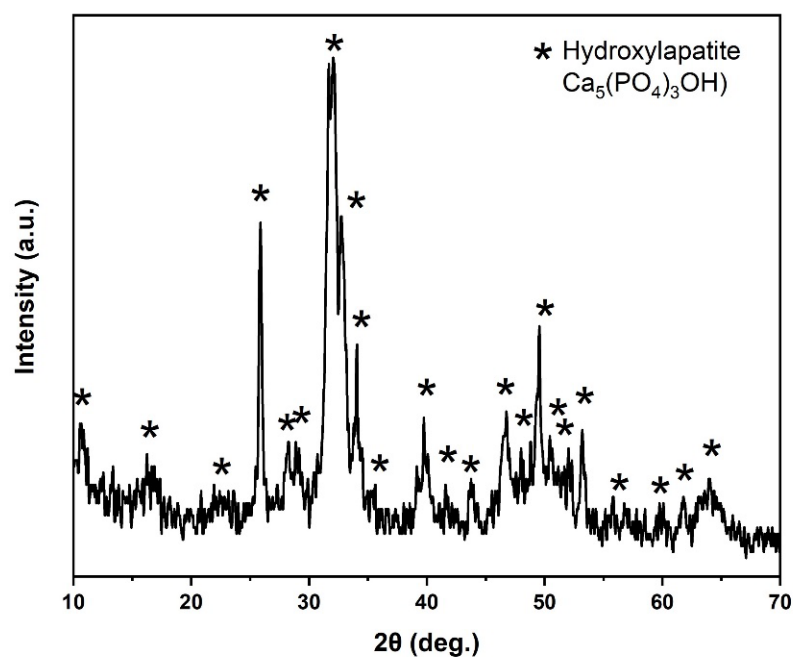

Figure S2. Phase composition and structure of HAp.

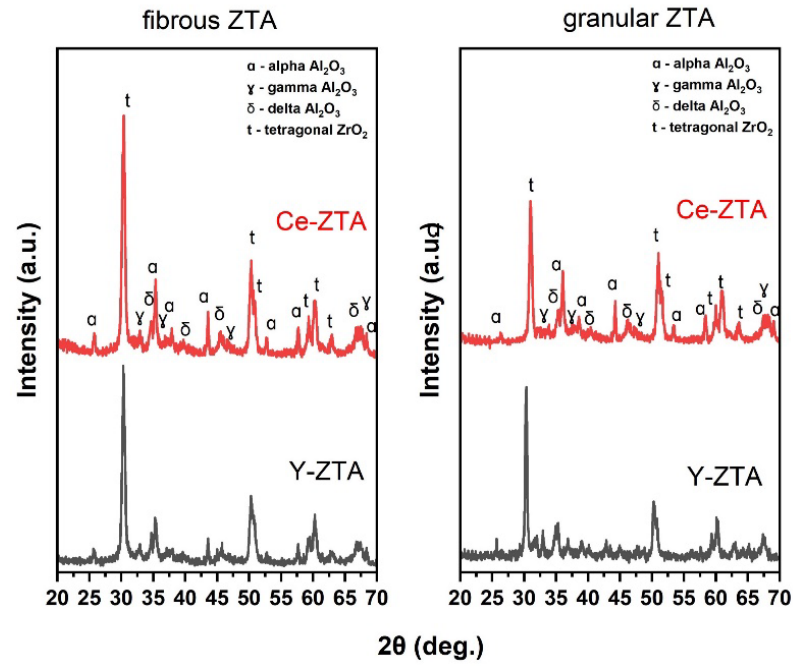

**Figure S3.** Phase composition of fibrous and granular reference ZTA samples.
